# Supplementary material for: Pre-clinical validation of a novel pan-cancer CAR-T cell immunotherapy against nfP2X7
Source: Research Square preprint supplement (doi:10.21203/rs.3.rs-1073214/v1), 2021-12-01
Supplement: Supplementary file 1 [file 5932a6dc74a1d626778b937f.docx]

**Supplementary Information**

**Supplementary Table 1** Details of cancer cell lines used in this study

| Cell line name | Cancer type | Media | Obtained from |
| --- | --- | --- | --- |
| PC9 | Adenocarcinoma | RPMI 1640 media (Sigma Aldrich) supplemented with 2mM L-glutamine (Gibco) and 10% foetal bovine serum (Scientifix) | CellBank Australia, the European Collection of Cell Cultures |
| K562, | Leukemia | RPMI 1640 media (Sigma Aldrich) supplemented with 10% foetal bovine serum (Scientifix) | American Type Culture Collection |
| K562-OKT3 | Leukemia | RPMI 1640 media (Sigma Aldrich) supplemented with 10% foetal bovine serum (Scientifix) | Kindly provided by Prof Michale Jensen (Seattle Children’s Research Institute, Seattle). |
| K562-Luc | Leukemia | RPMI 1640 media (Sigma Aldrich) supplemented with 10% foetal bovine serum (Scientifix) | CellBank Australia, Japanese Collection of Research Bioresources Cell Bank |
| MDA-MB-231 | Breast | DMEM media (Sigma Aldrich) supplemented with 10% foetal bovine serum (Scientifix) | The human triple negative breast adenocarcinoma MDA-MB-231 cell line used in *in vivo* experiments was kindly provided by Prof Robin Anderson (Olivia Newton-John Cancer Research Institute, VIC). |
| MDA-MB-231-Luc | Breast | DMEM media (Sigma Aldrich) supplemented with 10% foetal bovine serum (Scientifix) | CellBank Australia, Japanese Collection of Research Bioresources Cell Bank |
| MDA-MB-231-LM2 | Breast | DMEM media (Sigma Aldrich) supplemented with 10% foetal bovine serum (Scientifix) | Gifted from J Massague, Sloan Kettering Institute |
| BT-549-Luc | Breast | RPMI 1640 media (Sigma Aldrich) supplemented with 10% foetal bovine serum (Scientifix) and 0.023IU Insulin (Protaphone) | CellBank Australia, Japanese Collection of Research Bioresources Cell Bank |
| HCT-116 | Colorectal | DMEM media (Sigma Aldrich) supplemented with 2 mM L-glutamine (Gibco) and 10% foetal bovine serum (Scientifix) | CellBank Australia, the European Collection of Cell Cultures |
| Lim-1215 | Colorectal | RPMI 1640 media (Sigma Aldrich) supplemented with 2mM L-glutamine (Gibco), 10% foetal bovine serum (Scientifix), 25mM Hepes, 0.6mg/mL Insulin (Protaphone), 1mg/mL Hydrocortisone (Sigma) and 10mM 1-Thioglycerol (Merck) | CellBank Australia |
| LOVO | Colorectal | Ham’s F12 media (Sigma Aldrich) supplemented with 10% foetal bovine serum (Scientifix) | European Collection of Cell Cultures, purchased from CellBank Australia |
| U87 | Glioma | EMEM (EBSS) + 2mM Glutamine + 1% Non-Essential Amino Acids (NEAA) + 1mM Sodium Pyruvate (NaP) + 10% Foetal Bovine Serum (FBS). | American Type Culture Collection |
| UM-SCC-1 | Head and neck squamous carcinoma | RPMI 1640 media (Sigma Aldrich) supplemented with 10% foetal bovine serum (Scientifix) | American Type Culture Collection |
| NCI-H460-Luc | Lung | RPMI 1640 media (Sigma Aldrich) supplemented with 10% foetal bovine serum (Scientifix) | CellBank Australia, Japanese Collection of Research Bioresources Cell Bank |
| Namalwa | Lymphoma | RPMI 1640 media (Sigma Aldrich) supplemented with 2mM L-glutamine (Gibco) and 10% foetal bovine serum (Scientifix) | CellBank Australia, the European Collection of Cell Cultures |
| Raji | Lymphoma | RPMI 1640 media (Sigma Aldrich) supplemented with 2mM L-glutamine (Gibco) and 10% foetal bovine serum (Scientifix) | CellBank Australia, the European Collection of Cell Cultures |
| Ramos | Lymphoma | RPMI 1640 media (Sigma Aldrich) supplemented with 2mM L-glutamine (Gibco) and 10% foetal bovine serum (Scientifix) | CellBank Australia, the European Collection of Cell Cultures |
| C32 | Melanoma | RPMI 1640 media (Sigma Aldrich) supplemented with 10% foetal bovine serum (Scientifix) | American Type Culture Collection |
| M21 | Melanoma |  | American Type Culture Collection |
| Skmel-5 | Melanoma | RPMI 1640 media (Sigma Aldrich) supplemented with 10% foetal bovine serum (Scientifix) | American Type Culture Collection |
| Skmel-28 | Melanoma | RPMI 1640 media (Sigma Aldrich) supplemented with 10% foetal bovine serum (Scientifix) | American Type Culture Collection |
| Be(2)-M17 | Neuroblastoma | Ham’s F12 / EMEM media (both Sigma Aldrich) supplemented with 1% NEAA (Life Technologies), 2 mM L-glutamine (Gibco) and 15% foetal bovine serum (Scientifix) | CellBank Australia, the European Collection of Cell Cultures |
| Kelly | Neuroblastoma | RPMI 1640 media (Sigma Aldrich) supplemented with 2mM L-glutamine (Gibco) and 10% foetal bovine serum (Scientifix) | CellBank Australia, the European Collection of Cell Cultures |
| SH-5Y-SY | Neuroblastoma | Ham’s F12 / EMEM (ATCC) media supplemented with 1% NEAA (Life Technologies), 2 mM L-glutamine (Gibco) and 15% foetal bovine serum (Scientifix) | CellBank Australia, the European Collection of Cell Cultures |
| SK-N-DZ | Neuroblastoma | DMEM media (Sigma Aldrich) supplemented with 2 mM L-glutamine (Gibco), 20% foetal bovine serum (Scientifix) and 1% NEAA (Sigma Aldrich) | CellBank Australia, the European Collection of Cell Cultures |
| OVCAR3-Luc | Ovarian | RPMI 1640 media (Sigma Aldrich) supplemented with 15U Insulin (Protaphone), 20% foetal bovine serum (Scientifix) | CellBank Australia, Japanese Collection of Research Bioresources Cell Bank |
| OVCAR5 | Ovarian | RPMI 1640 media (Sigma Aldrich) supplemented with 2 mM L-glutamine (Gibco) and 10% foetal bovine serum (Scientifix) | Dr Thomas Hamilton (Fox Chase Cancer Center, PA, USA) |
| AsPC-1/CMV-Luc | Pancreatic | RPMI 1640 media (Sigma Aldrich) supplemented with 10% foetal bovine serum (Scientifix) | CellBank Australia, Japanese Collection of Research Bioresources Cell Bank |
| PC3-Luc | Prostate | Ham’s F12 media supplemented with 7% foetal bovine serum (Scientifix) | CellBank Australia, the European Collection of Cell Cultures |
| DU-145-luc | Prostate | EMEM media (Sigma Aldrich) supplemented with 10% foetal bovine serum (Scientifix) | CellBank Australia, Japanese Collection of Research Bioresources Cell Bank |
| RPMI-8226 | Myeloma | RPMI 1640 media (Sigma Aldrich) supplemented with 10% foetal bovine serum (Scientifix) | Kindly provided by Dr Krzysztof Mrozik, University of Adeliade |
| RD | Rhabdomyosarcoma | DMEM media (Sigma Aldrich) supplemented with 2 mM L-glutamine (Gibco), 10% foetal bovine serum (Scientifix), 2% NEAA (Life Technologies) and 2% Vitamins (Gibco) | CellBank Australia, the European Collection of Cell Cultures |

**Supplementary Table 2 Monoclonal antibodies and related reagents**

| **Primary antibodies for flow cytometry and cell culture** | | | | |  |
| --- | --- | --- | --- | --- | --- |
| Antigen | Conjugate | Clone | Manufacturer | Final concentration or dilution from manufacturer’s test size | Final dilution |
| CD3 | BUV737  Purified (cell culture) | UCHT1  OKT3 | BD  Invitrogen | 30ng/ml  1/8 | 1:250 |
| CD4 | BUV496 | SK3 | BD | 1/4 | 1:200 |
| CD8 | BUV395 | RPA-T8 | BD | 1/8 | 1:250 |
| Granzyme B | BV421 | GB11 | BD | 1/2 | 1:100 |
| Perforin | FITC | B-D48 | Biolegend | 1/4 | 1:200 |
| CD107a | PECy7 | H4A3 | BD | 1/6 | 1:300 |
| IFNγ | PE | B27 | BD | Recommended | 1:12.5 |
| TNFa | APC | MAb11 | BD | 1/2 | 1:200 |
| IL-2 | BV711 | 5344.111 | BD | 1/4 | 1:50 |
| CCR7 | PE | 150503  2-L1-A | BD  BD | Recommended  Recommended | 1:12.5 |
| CD45RA | BB515 | HI100 | BD | 1/6 | 1:250 |
| CD45RO | PECy7 | UCHL1 | BD | Recommended | 1:50 |
| CD62L | BV421 | DREG-56 | BD | 1/2 | 1:15 |
| EGFR | eF660 | me1B3 | BD | Recommended | 1:50 |
| CD27 | APC | M-T271 | BD | Recommended | 1:25 |
| CD28 | BUV737 | CD28.2 | BD | Recommended | 1:50 |
| CD95 | PECy7 | DX2 | BD | 1/8 | 1:200 |
| CXCR3 | BV421 | 1C6/CXCR3 | BD | Recommended | 1:50 |
| PD-1 | PECy7 | EH12.1 | BD | Recommended | 1:50 |
| CTLA-4 | BV421 | BNI3 | BD | Recommended | 1:50 |
| TIM-3 | BB515 | 7D3 | BD | Recommended | 1:50 |
| LAG-3 | APC | T47-530 | BD | Recommended | 1:50 |
| CD39 | PE-CF594  BUV805 | TU66 | BD | Recommended | 1:50 |
| **Related flow cytometry reagents** | | | | |  |
| Reagent | Conjugate | Clone | Manufacturer | Final dilution |  |
| Fixable Viability Dye | 780 | - | BD | 1/1000 | 1:1000 |

**
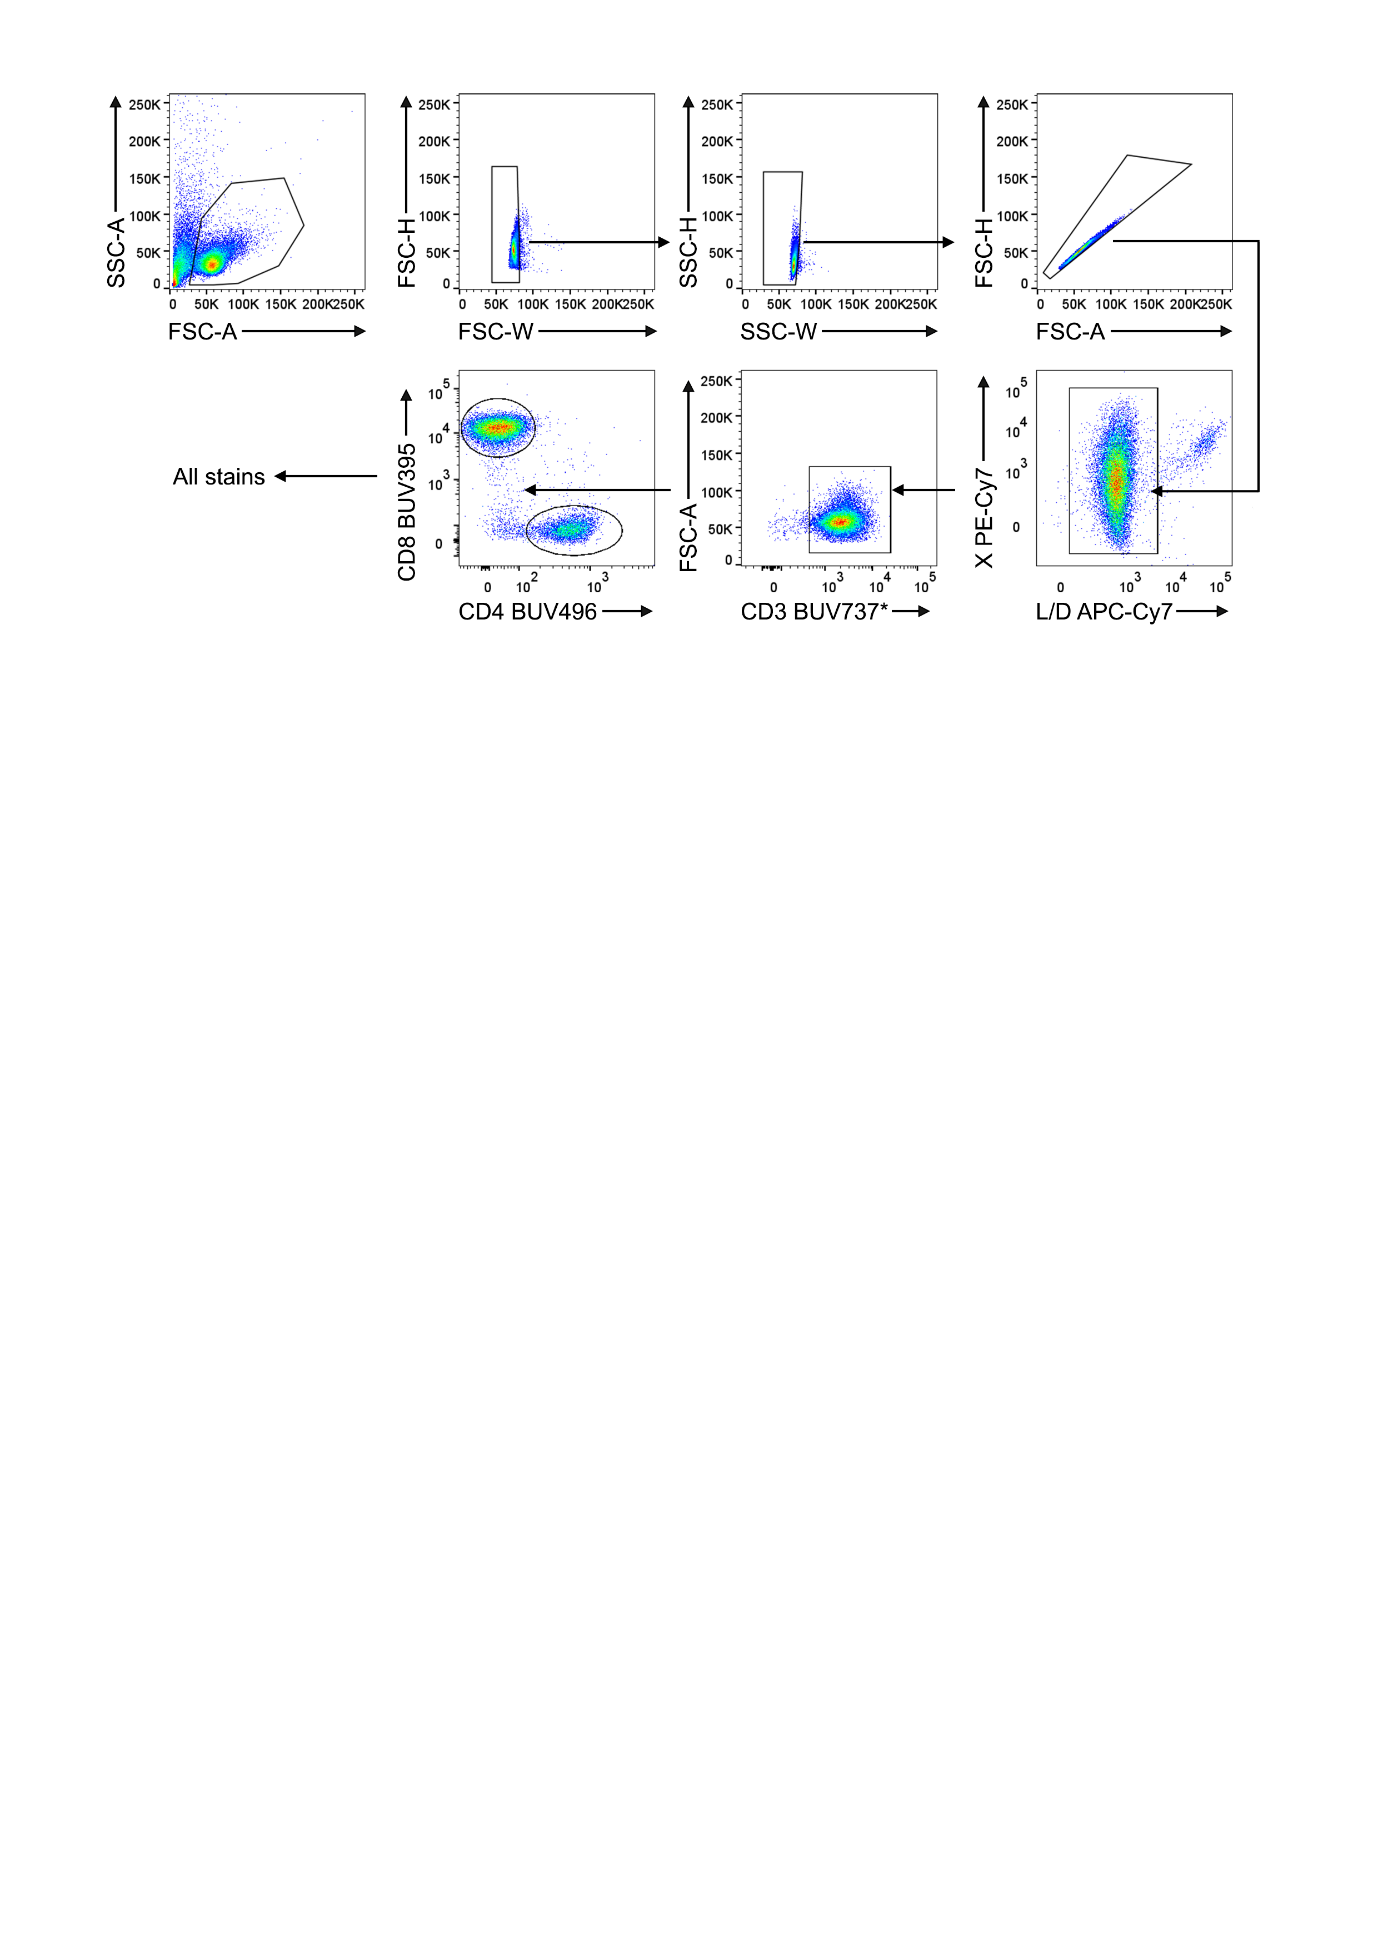
**

**Supplementary Figure 1: Flow cytometry pre-gating strategy for all stains.** Lymphocyte gating, single cell discrimination, viability gating, CD3+ gating, CD4+ or CD8+ gating serves as a pre-gate for all flow cytometry data, with the exception of the activation marker phenotyping. *In that panel, CD28-BUV737 was used such that the combination of fluorophores was optimised to reduce spectral spillover. As CD3 was conjugated to the same fluorophore and cells were routinely all CD3+, it was not included in the panel. X represents CD95, CD45RO, PD-1 or CD107a.


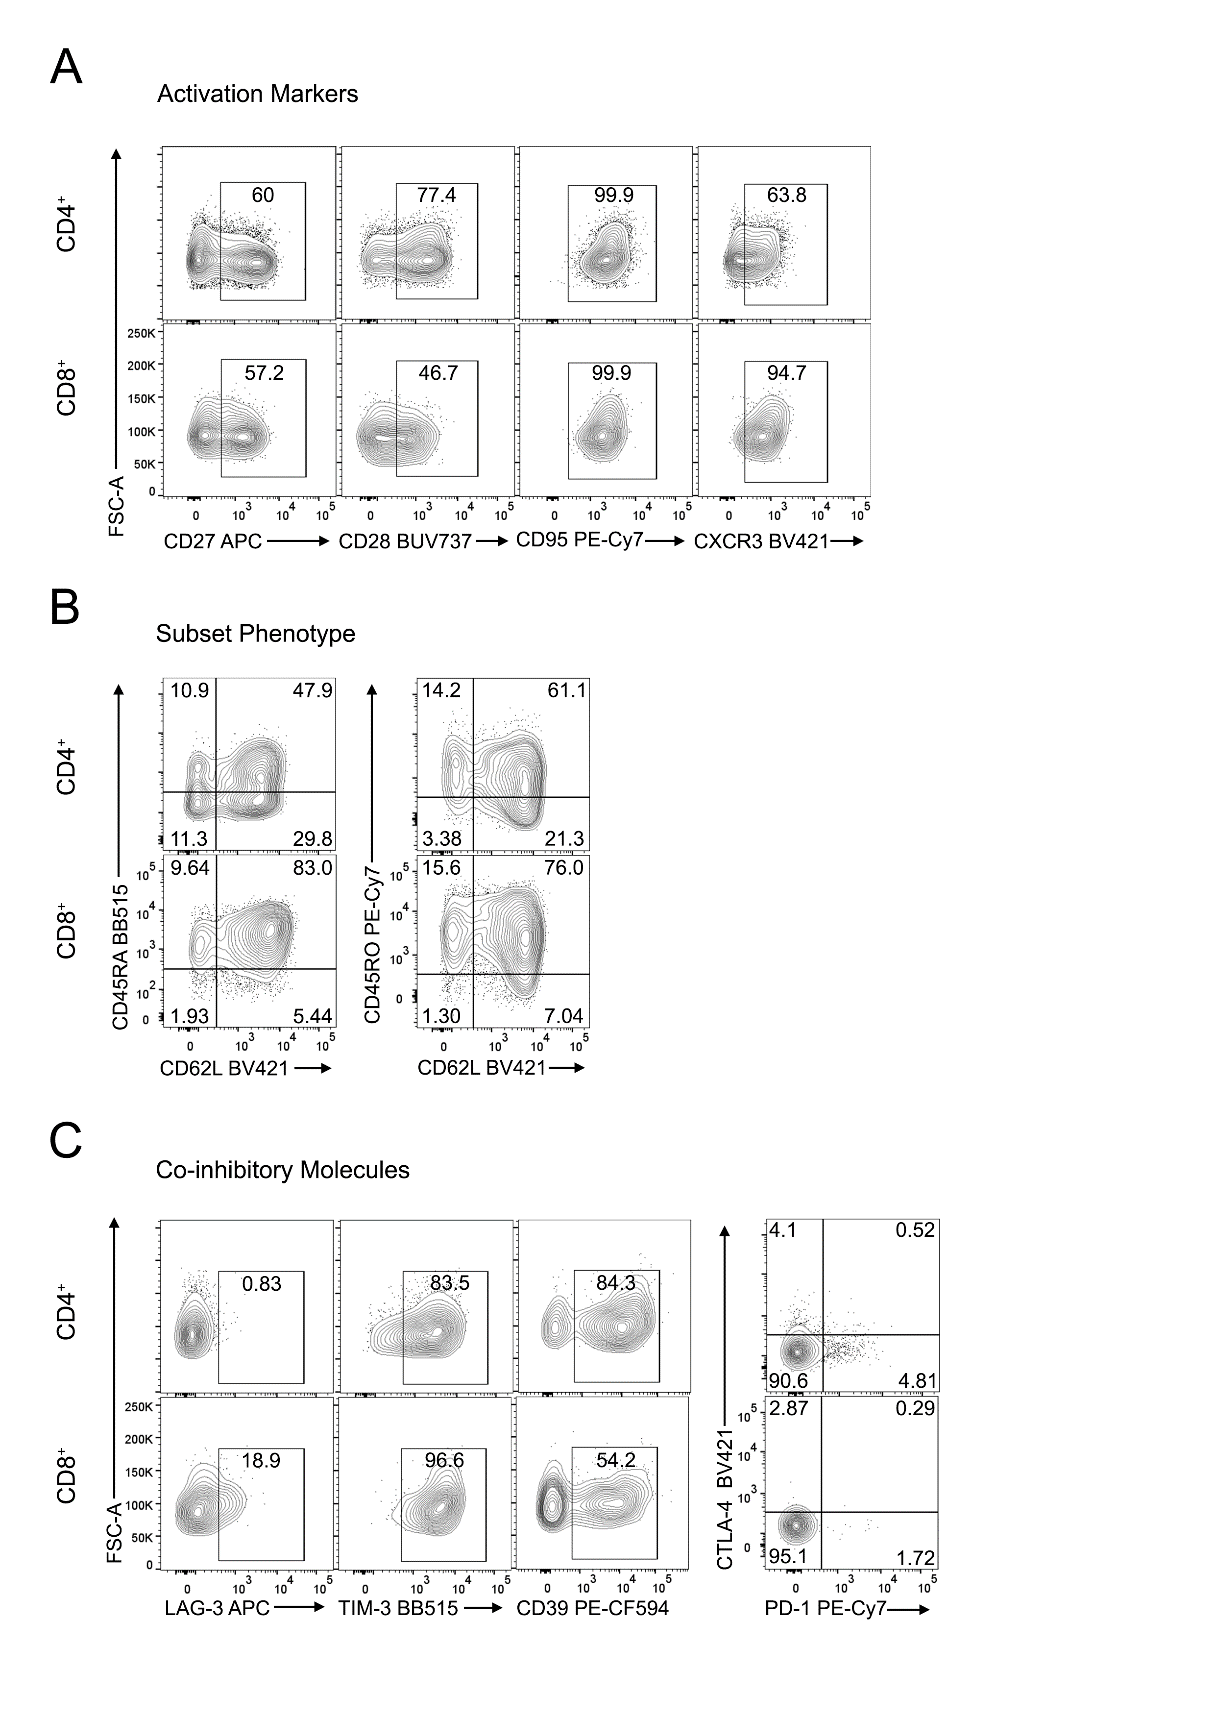


**Supplementary Figure 2: Flow cytometry gating strategy for T cell phenotype.** After setting pre-gates depicted in Supp. Figure 1, CD4+ and CD8+ T cells were gated for **(A)** activation marker expression, **(B)** subset phenotype and **(C)** co-inhibitory molecule expression. Gates were set on fluorescence minus one (FMO) controls, with the exception of CTLA-4, which was gated based on an FMO for cultured T cells or an isotype control for tumour suspensions.


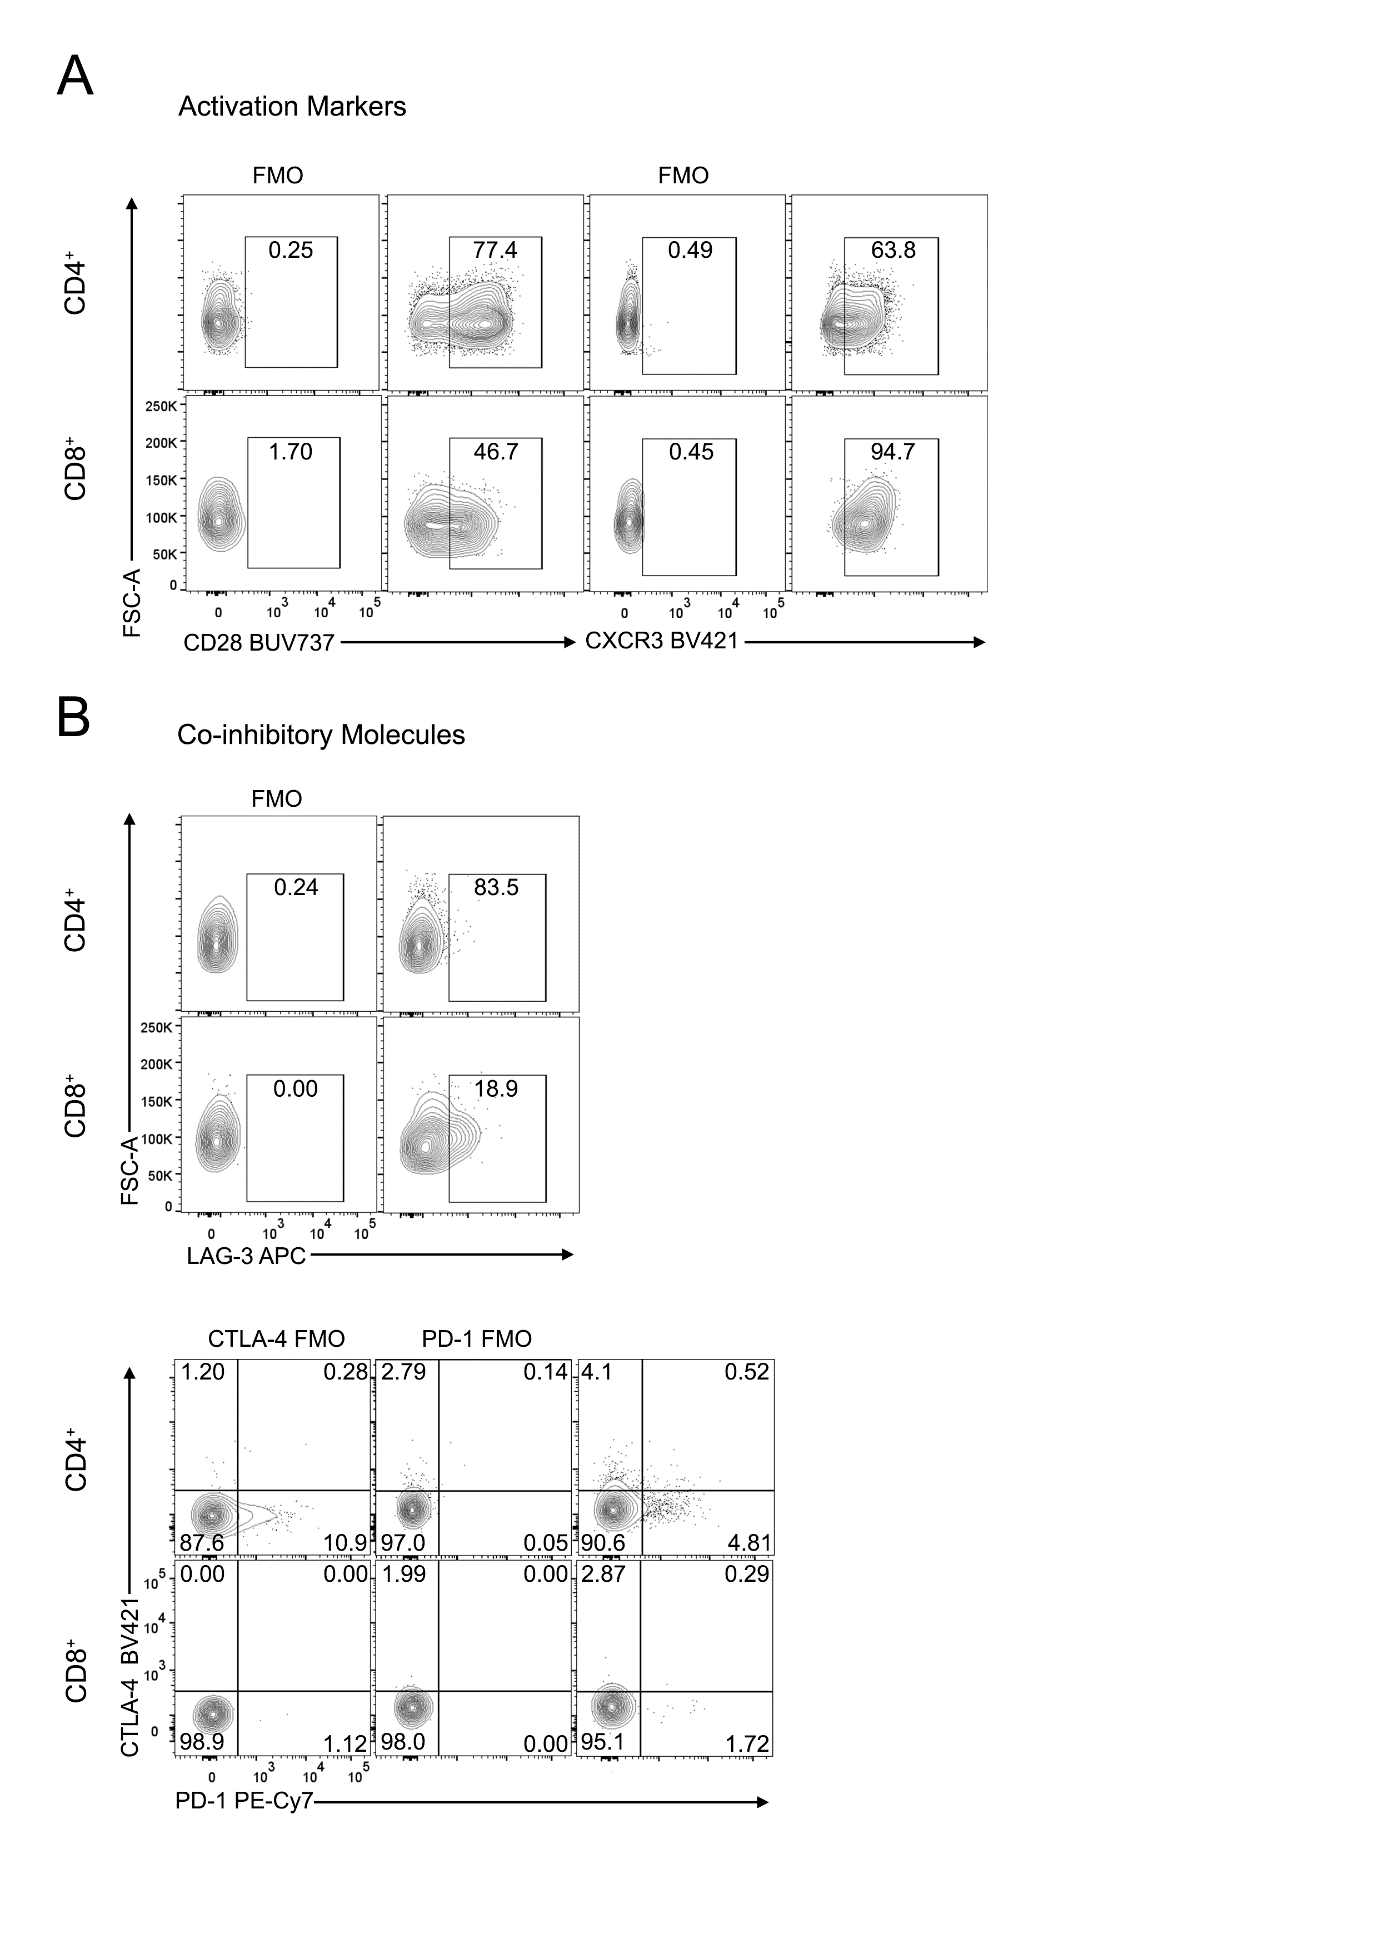


**Supplementary Figure 3: Flow cytometry gating strategy for T cell phenotype (FMOs).** After setting pre-gates depicted in Supp. Figure 1, CD4+ and CD8+ T cells were gated for **(A)** activation marker expression and **(B)** co-inhibitory molecule expression. FMO controls are shown alongside stained samples.


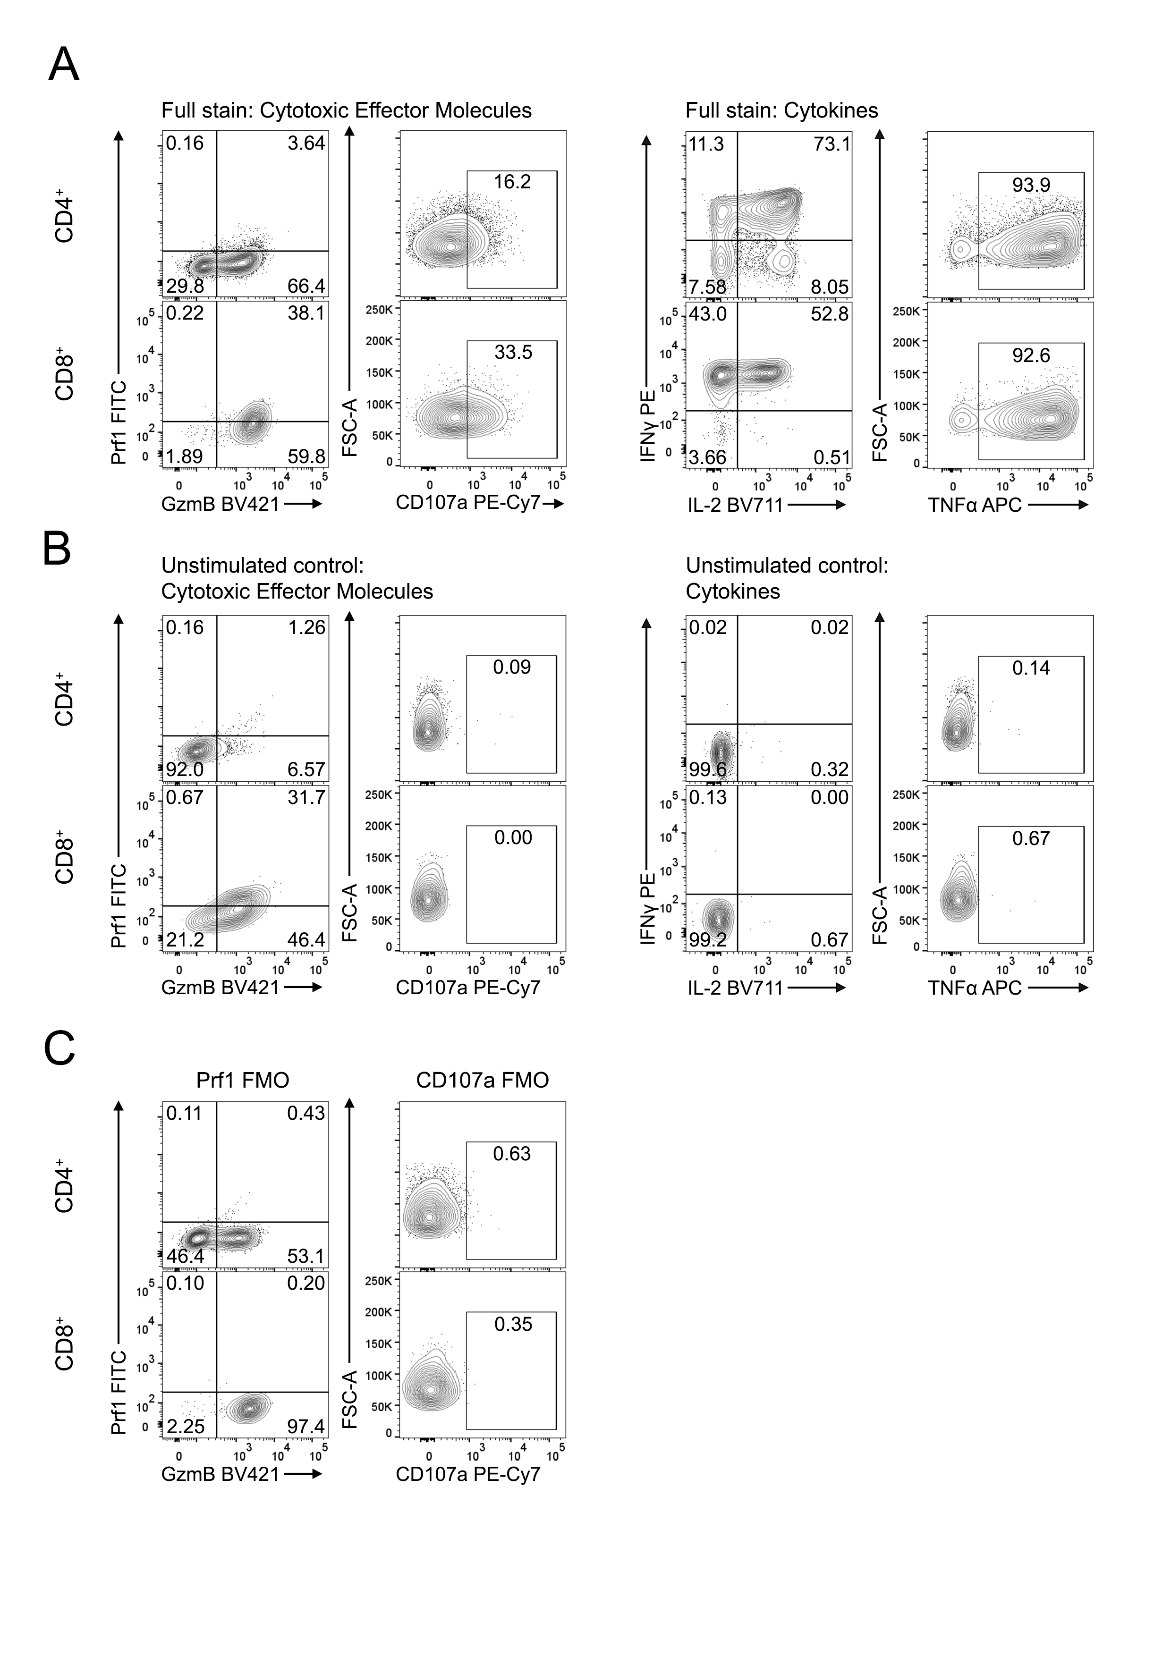


**Supplementary Figure 4: Flow cytometry gating strategy for cytotoxic molecule and cytokine expression.** After setting pre-gates depicted in Supp. Figure 1, **(A)** CD4+ and CD8+ T cells were gated for cytotoxic molecule and cytokine expression. Gates were set on a **(B)** unstimulated control and **(C)** FMO controls.

**
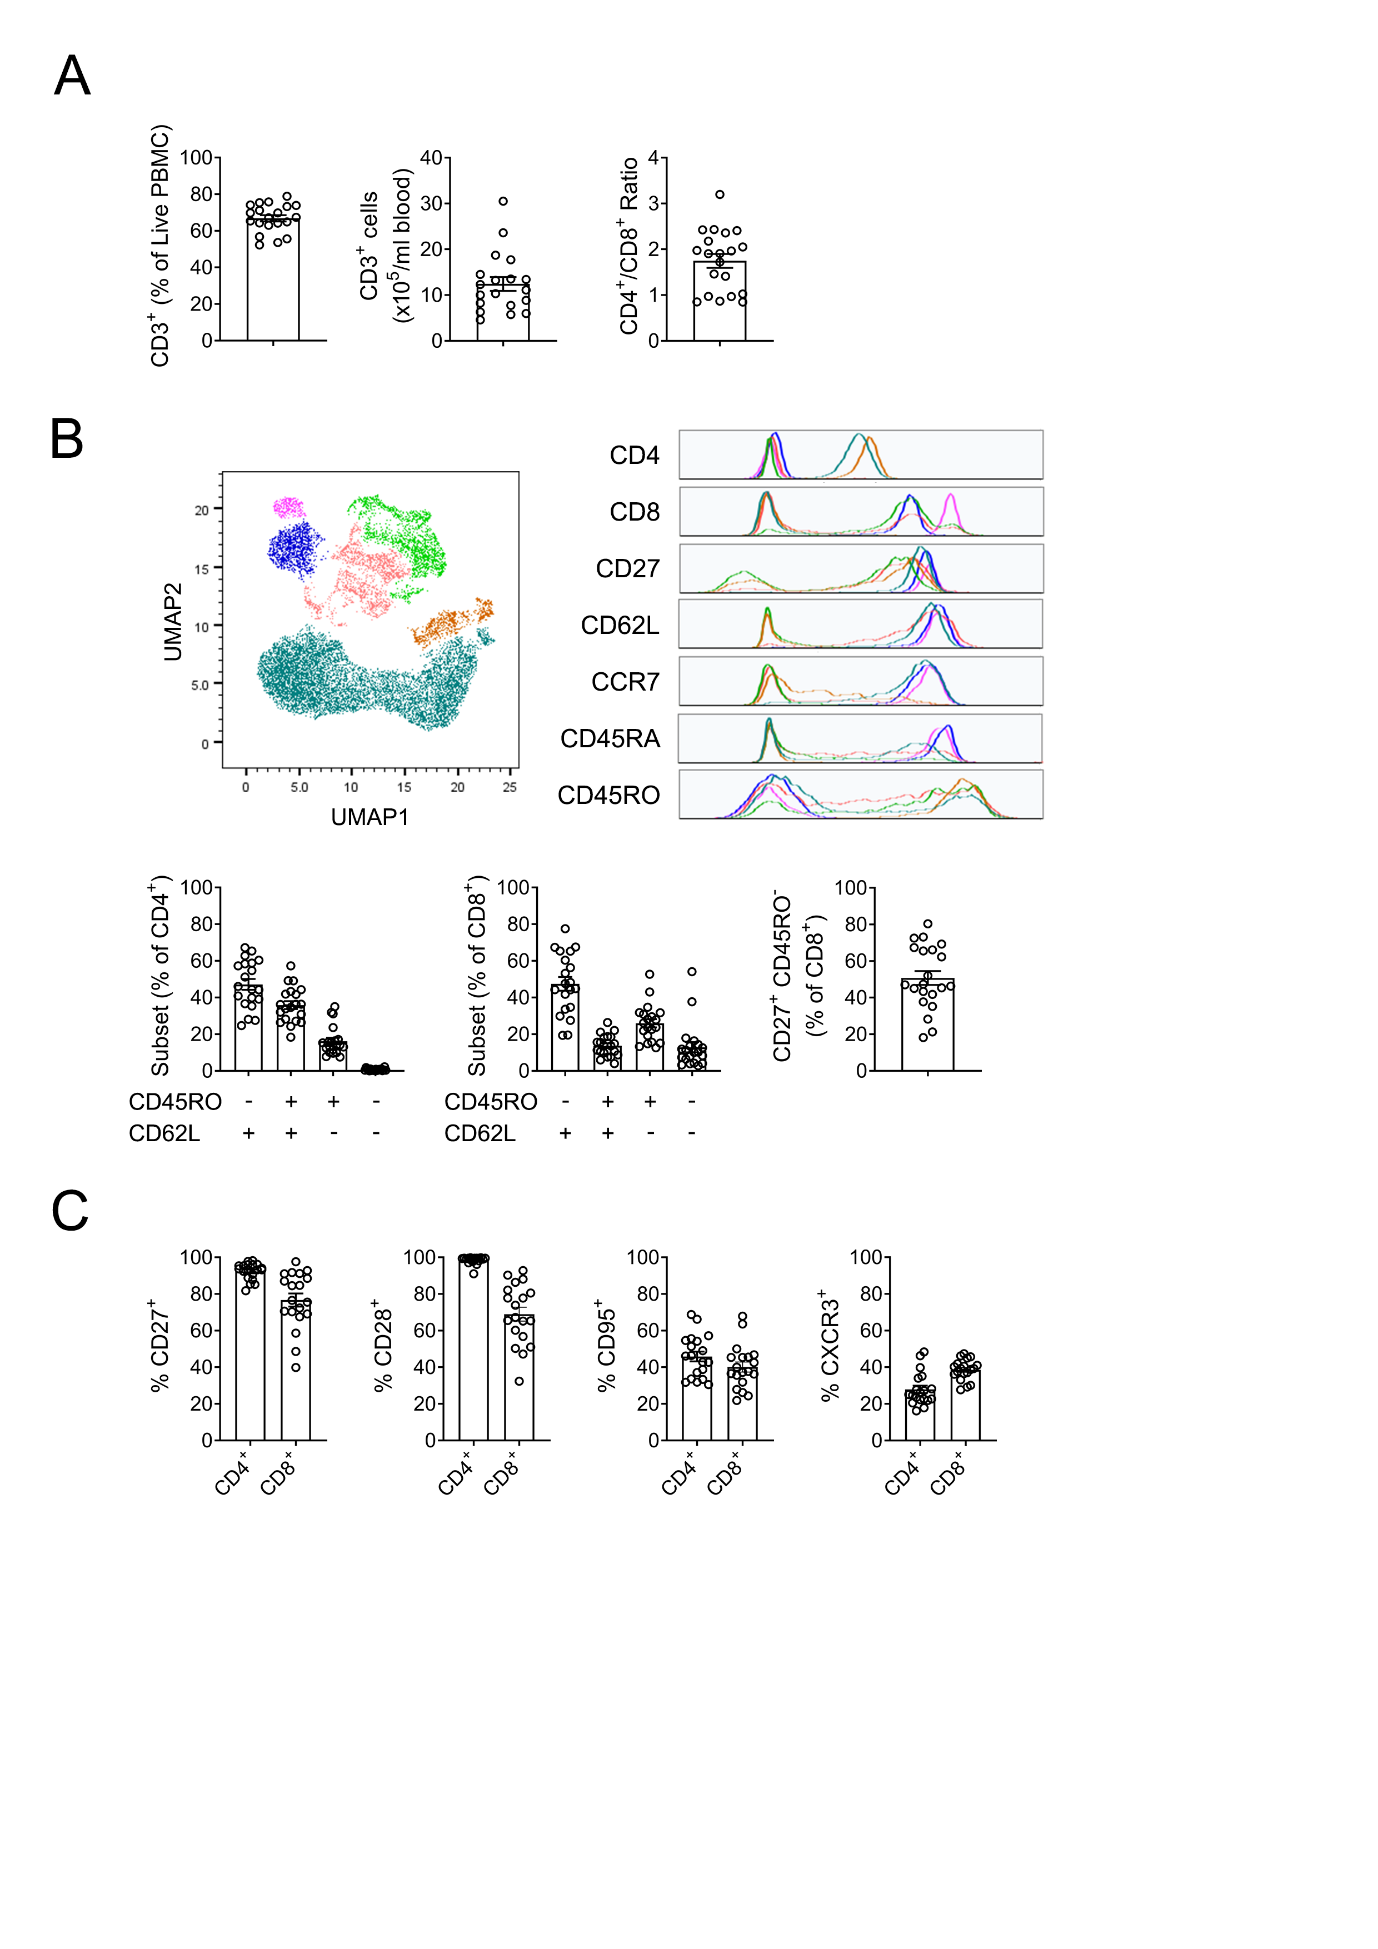
**

**Supplementary Figure 5: Phenotyping of peripheral blood T cells isolated from healthy donors.**

PBMCs were isolated from the fresh peripheral blood of healthy individuals and were assessed for differentiation and activation marker expression by flow cytometry. **(A)** Frequency of CD3+ cells of total live PBMC, number of CD3+ cells per ml of blood and CD4+/CD8+ ratio of CD3+. **(B)** UMAP analysis of differentiation/activation marker expression by CD3+ cells, represented as two-dimensional clusters and histogram overlays of individual clusters. Frequencies of T cell subset phenotypes of CD4+ and CD8+ and frequency of CD27+ CD45RO- of CD8+. **(C)** Frequencies of activation markers, CD27, CD28, CD95 and CXCR3 of CD4+ and CD8+. Gating strategy is shown in Supp. Figure 1 and 2. Data pooled from 20 donors across three independent experiments and represented as mean ± SEM.

**
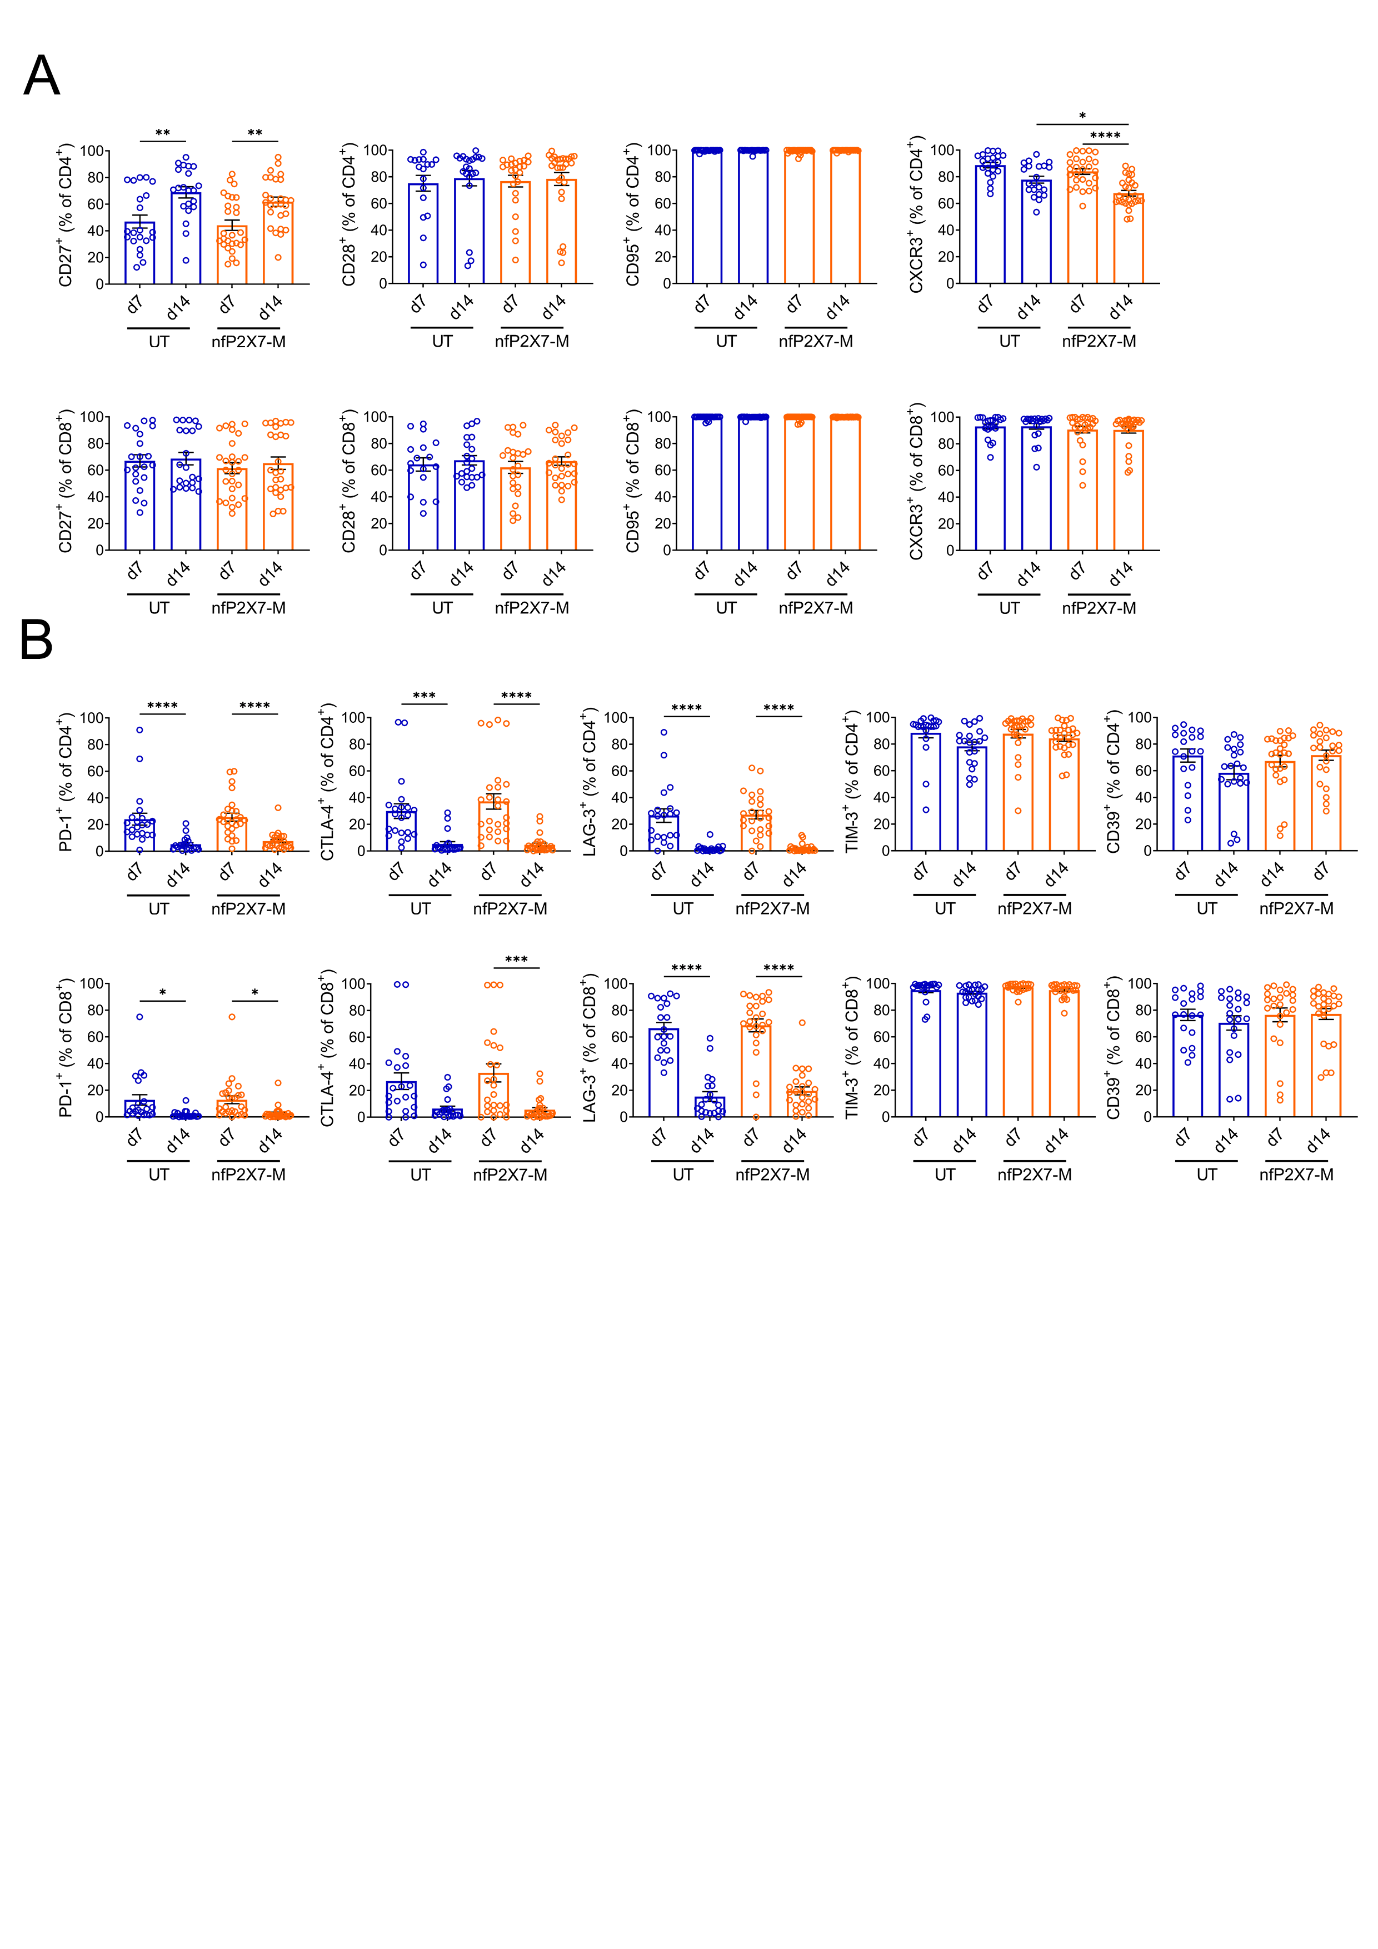
**

**Supplementary Figure 6: NfP2X7-targeting CAR-T cells, are highly activated and display minimal co-inhibitory molecule expression.** NfP2X7-targeting CAR-T cells were generated and stimulated with α-CD3, α-CD28 and irradiated PBMC. **(A)** Frequency of CD27, CD28, CD95 and CXCR3 of CD4+ and CD8+ on d7 post-PBMC and d14 post-PBMC. **(B)** Frequency of PD-1, CTLA-4, LAG-3, TIM-3 and CD39 of CD4+ and CD8+ on d7 post-PBMC and d14 post-PBMC. Gating strategy is shown in Supp. Figure 1 and 2. Data pooled from 10 independent CAR-T preparations, derived from 8 healthy donors. Data represented as mean ± SEM; Ordinary one-way ANOVA with Bonferroni’s post-test; * p≤0.05, ** p≤0.01, *** p≤0.001, **** p≤0.0001; n = 20-27.

**
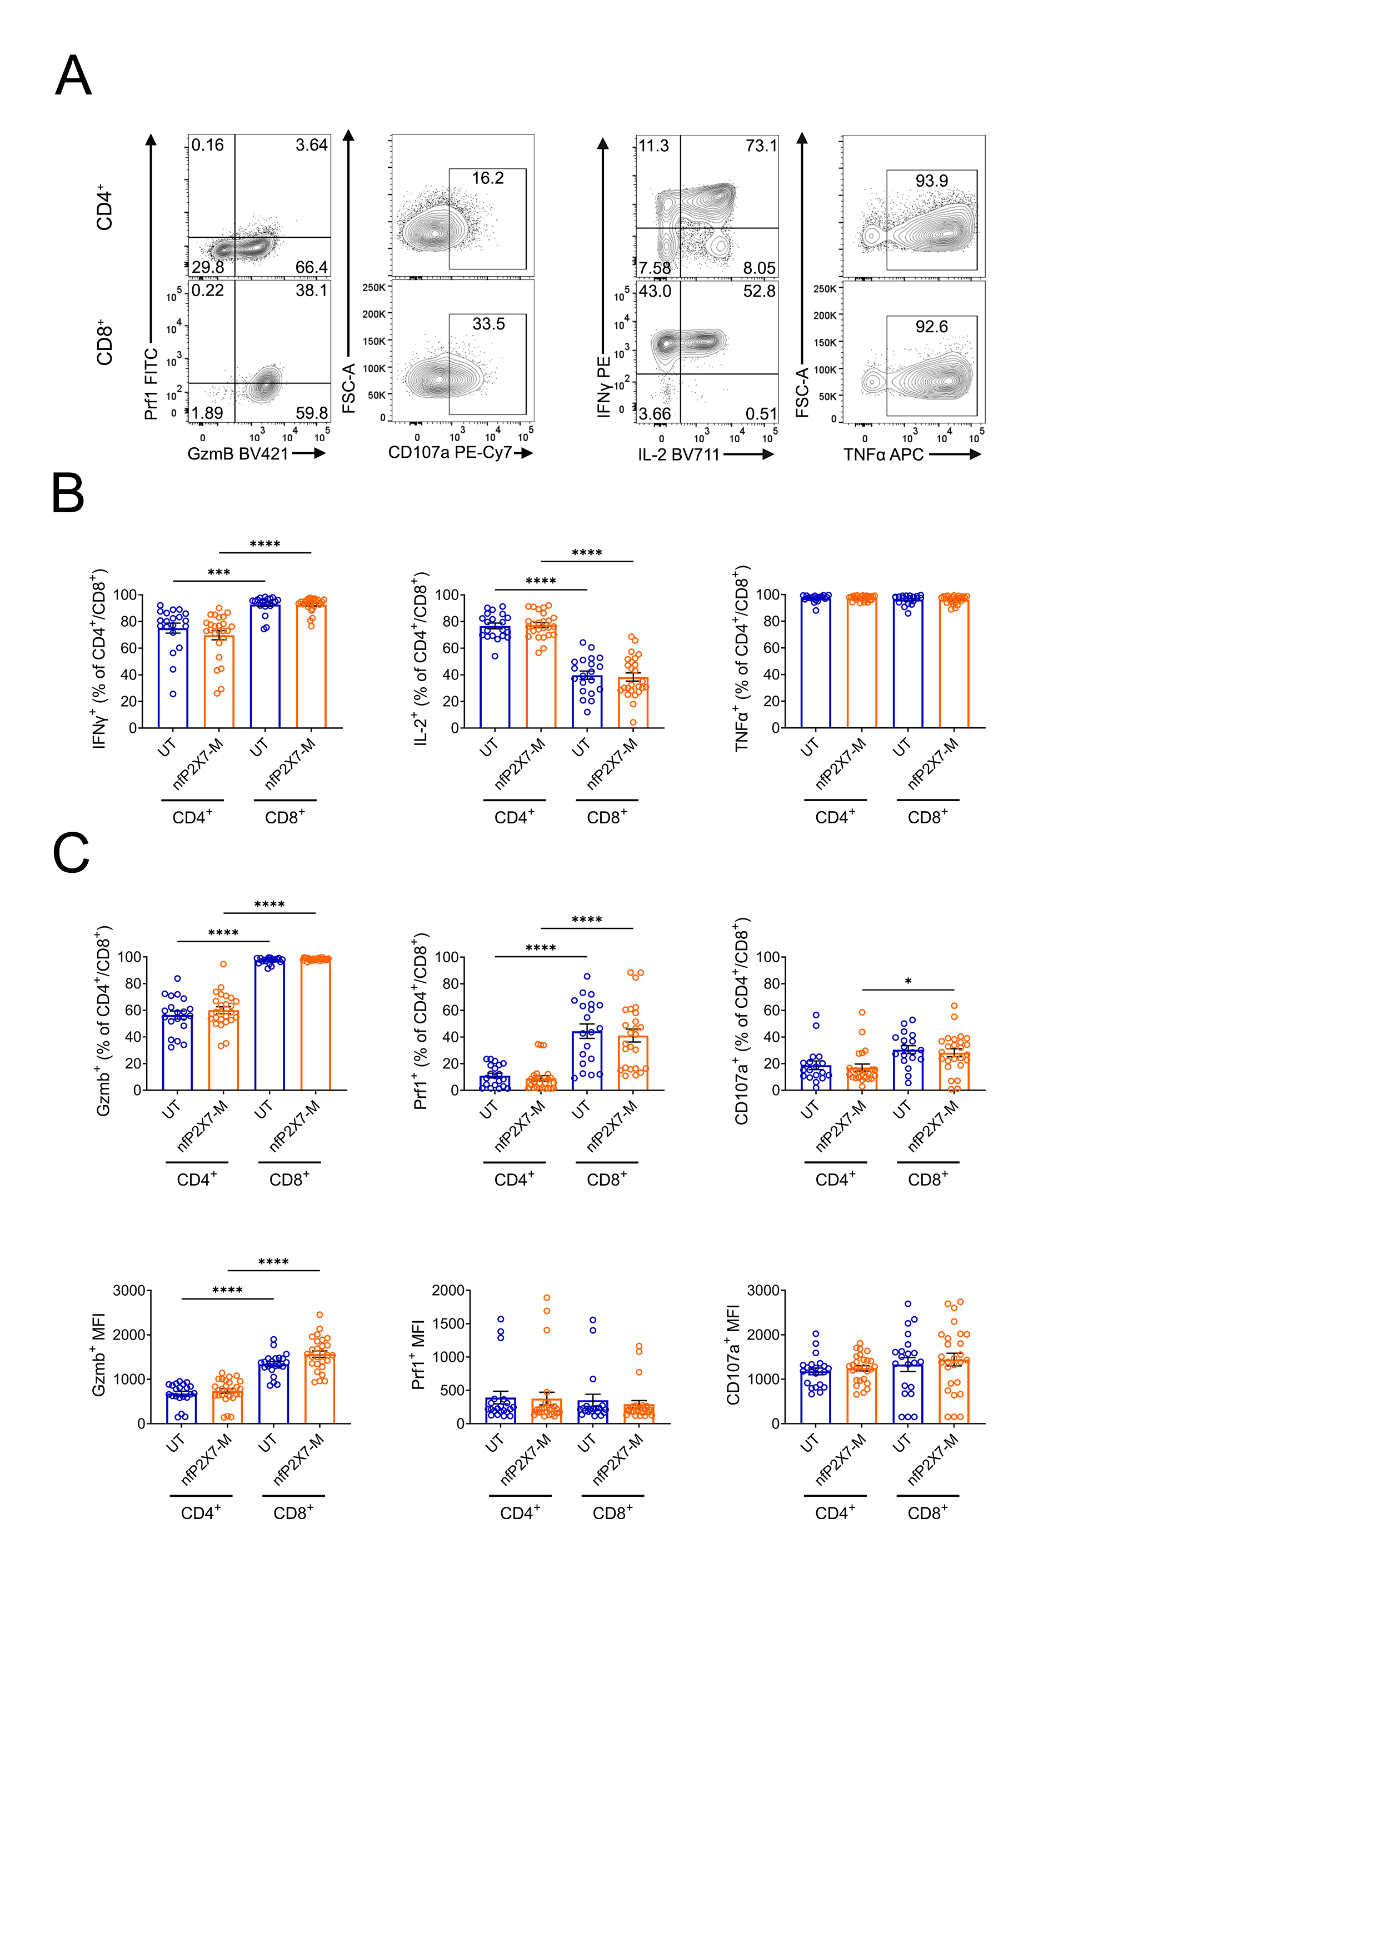
**

**Supplementary Figure 7: NfP2X7-targeting CAR-T cells express cytotoxic molecules and TH1 cytokines.** NfP2X7-targeting CAR-T cells were generated and stimulated with α-CD3, α-CD28 and irradiated PBMC. On d14 post-PBMC, cells were assessed by flow cytometry following PMA stimulation. **(A)** Representative flow cytometry on d14 post-PBMC. **(B)** Frequency of cytokine expression of CD4+ and CD8+. **(C)** Frequency and geometric fluorescence intensity (gMFI) of granzyme B, perforin and CD107a expression of CD4+ and CD8+. Gating strategy is shown in Supp. Figure 1 and 4. Data pooled from 10 independent CAR-T preparations, derived from 8 healthy donors. Data represented as mean ± SEM; Ordinary one-way ANOVA with Bonferroni’s post-test; * p≤0.05, *** p≤0.001, **** p≤0.0001; n = 20-27.


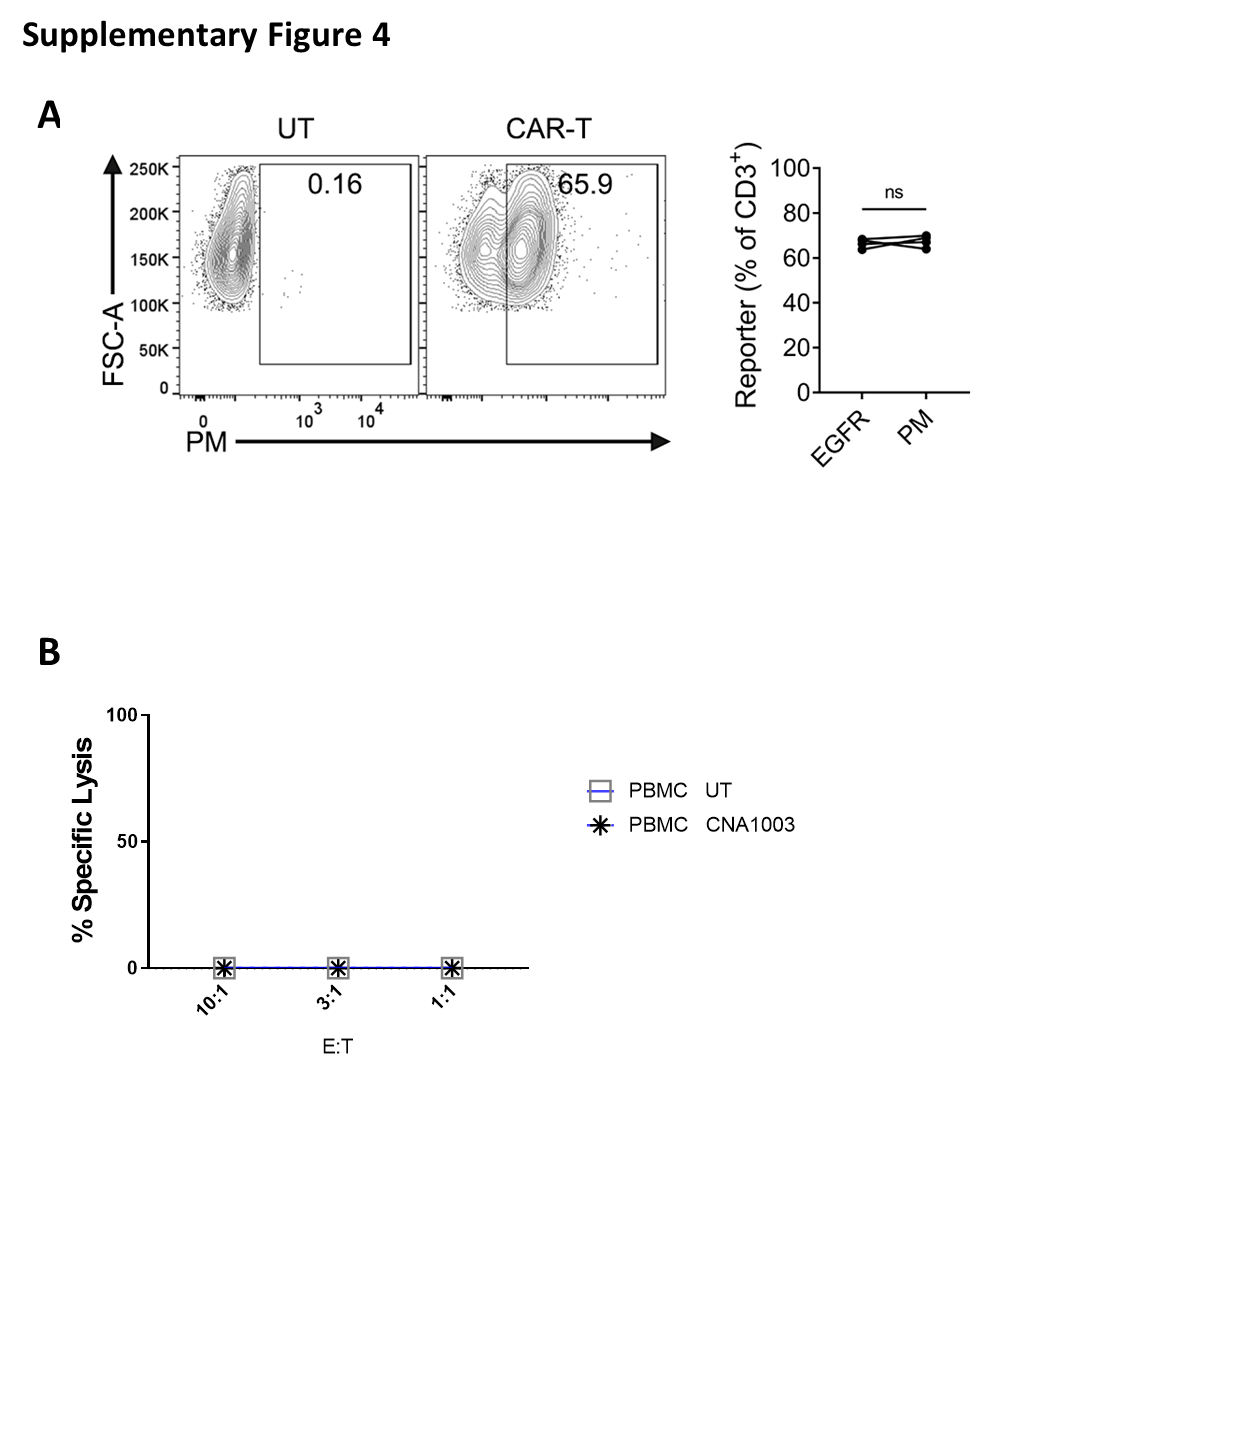


**Supplementary Figure 8: EGFRt reporter expression is a reliable measure of CAR expression (A)** Frozen nfP2X7-M CAR-T cells were thawed and rested in IL-2 and IL-15 for 2-3 days. Representative flow cytometry and frequency of CAR+ cells, based on EGFR expression and nfP2X7 peptide mimetic staining of the same cell population, pre-gated on CD3+; n = 4; paired *t*-test. Data in right panel pooled from four independent experiments. PM (peptide mimetic).


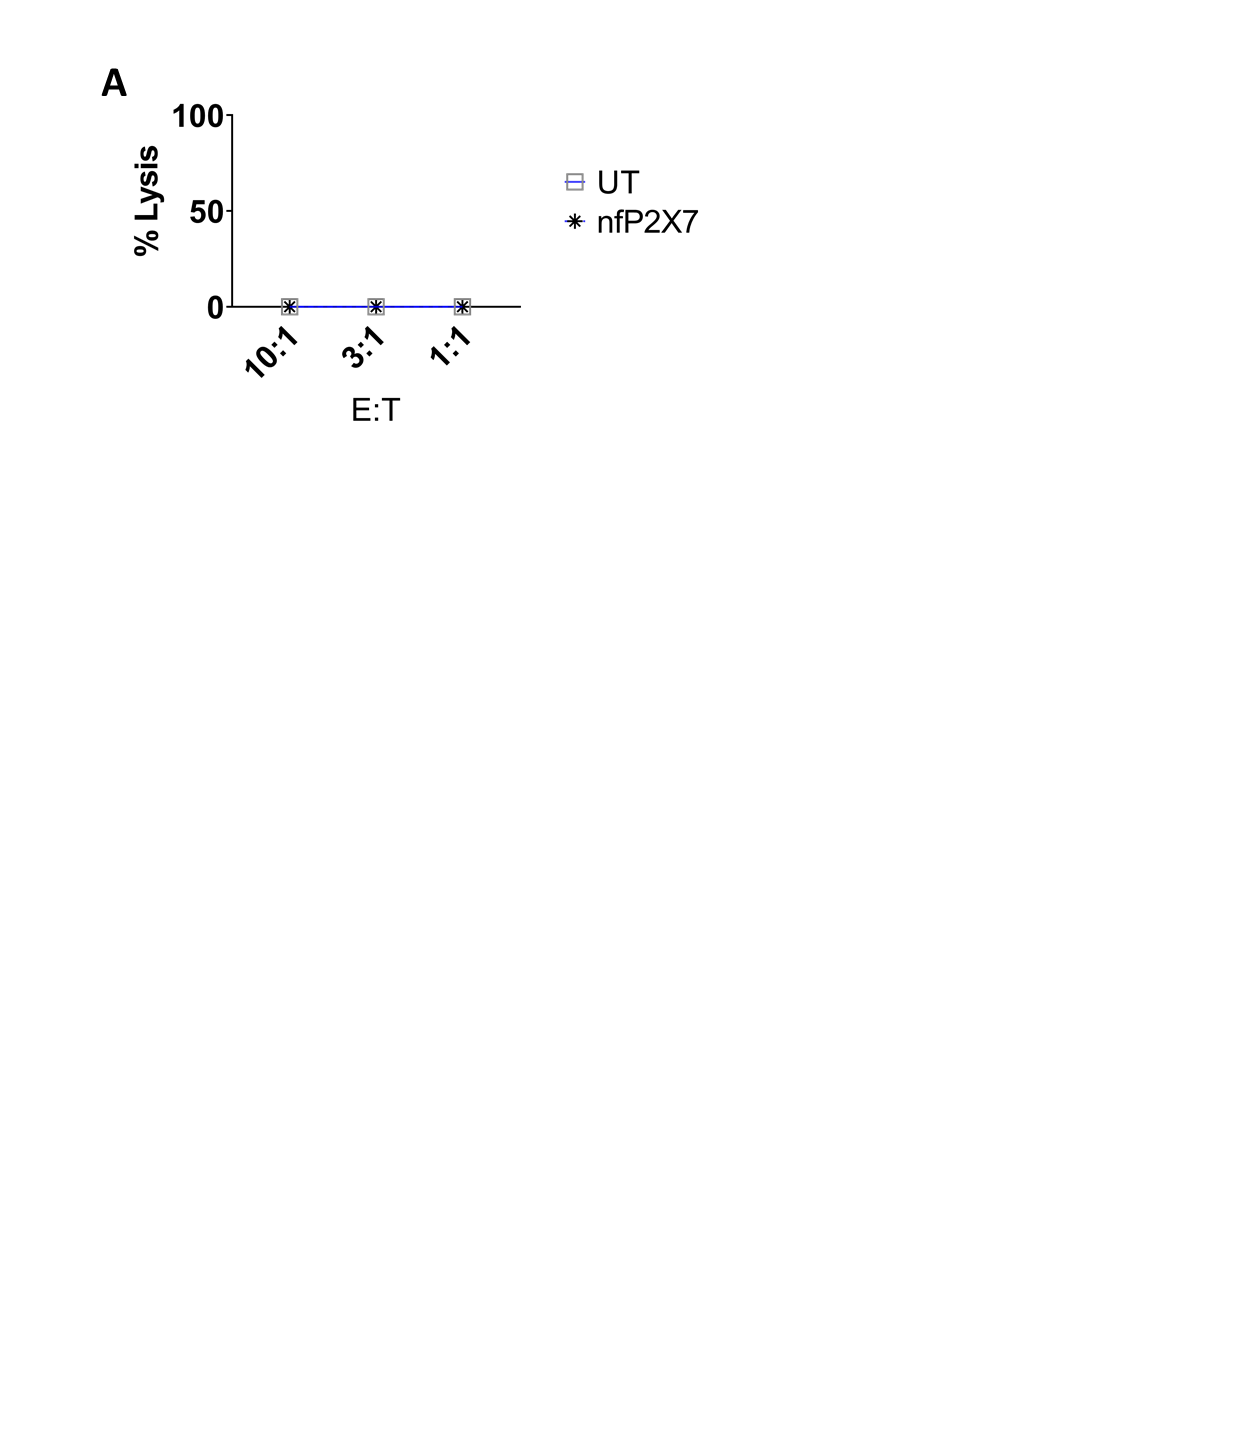


**Supplementary Figure 9 NfP2X7-M CAR-T cells were not cytotoxic towards healthy donor derived normal cells.** NfP2X7-M CAR-T cells were co-cultured with healthy donor-derived PBMCs at E:T ratios of 10:1, 3.3:1 and 1.1:1 for 18 h. Specific cytotoxicity was measured using a BrightGlo luciferase-based cytotoxicity assay system. Data from a single experiment.


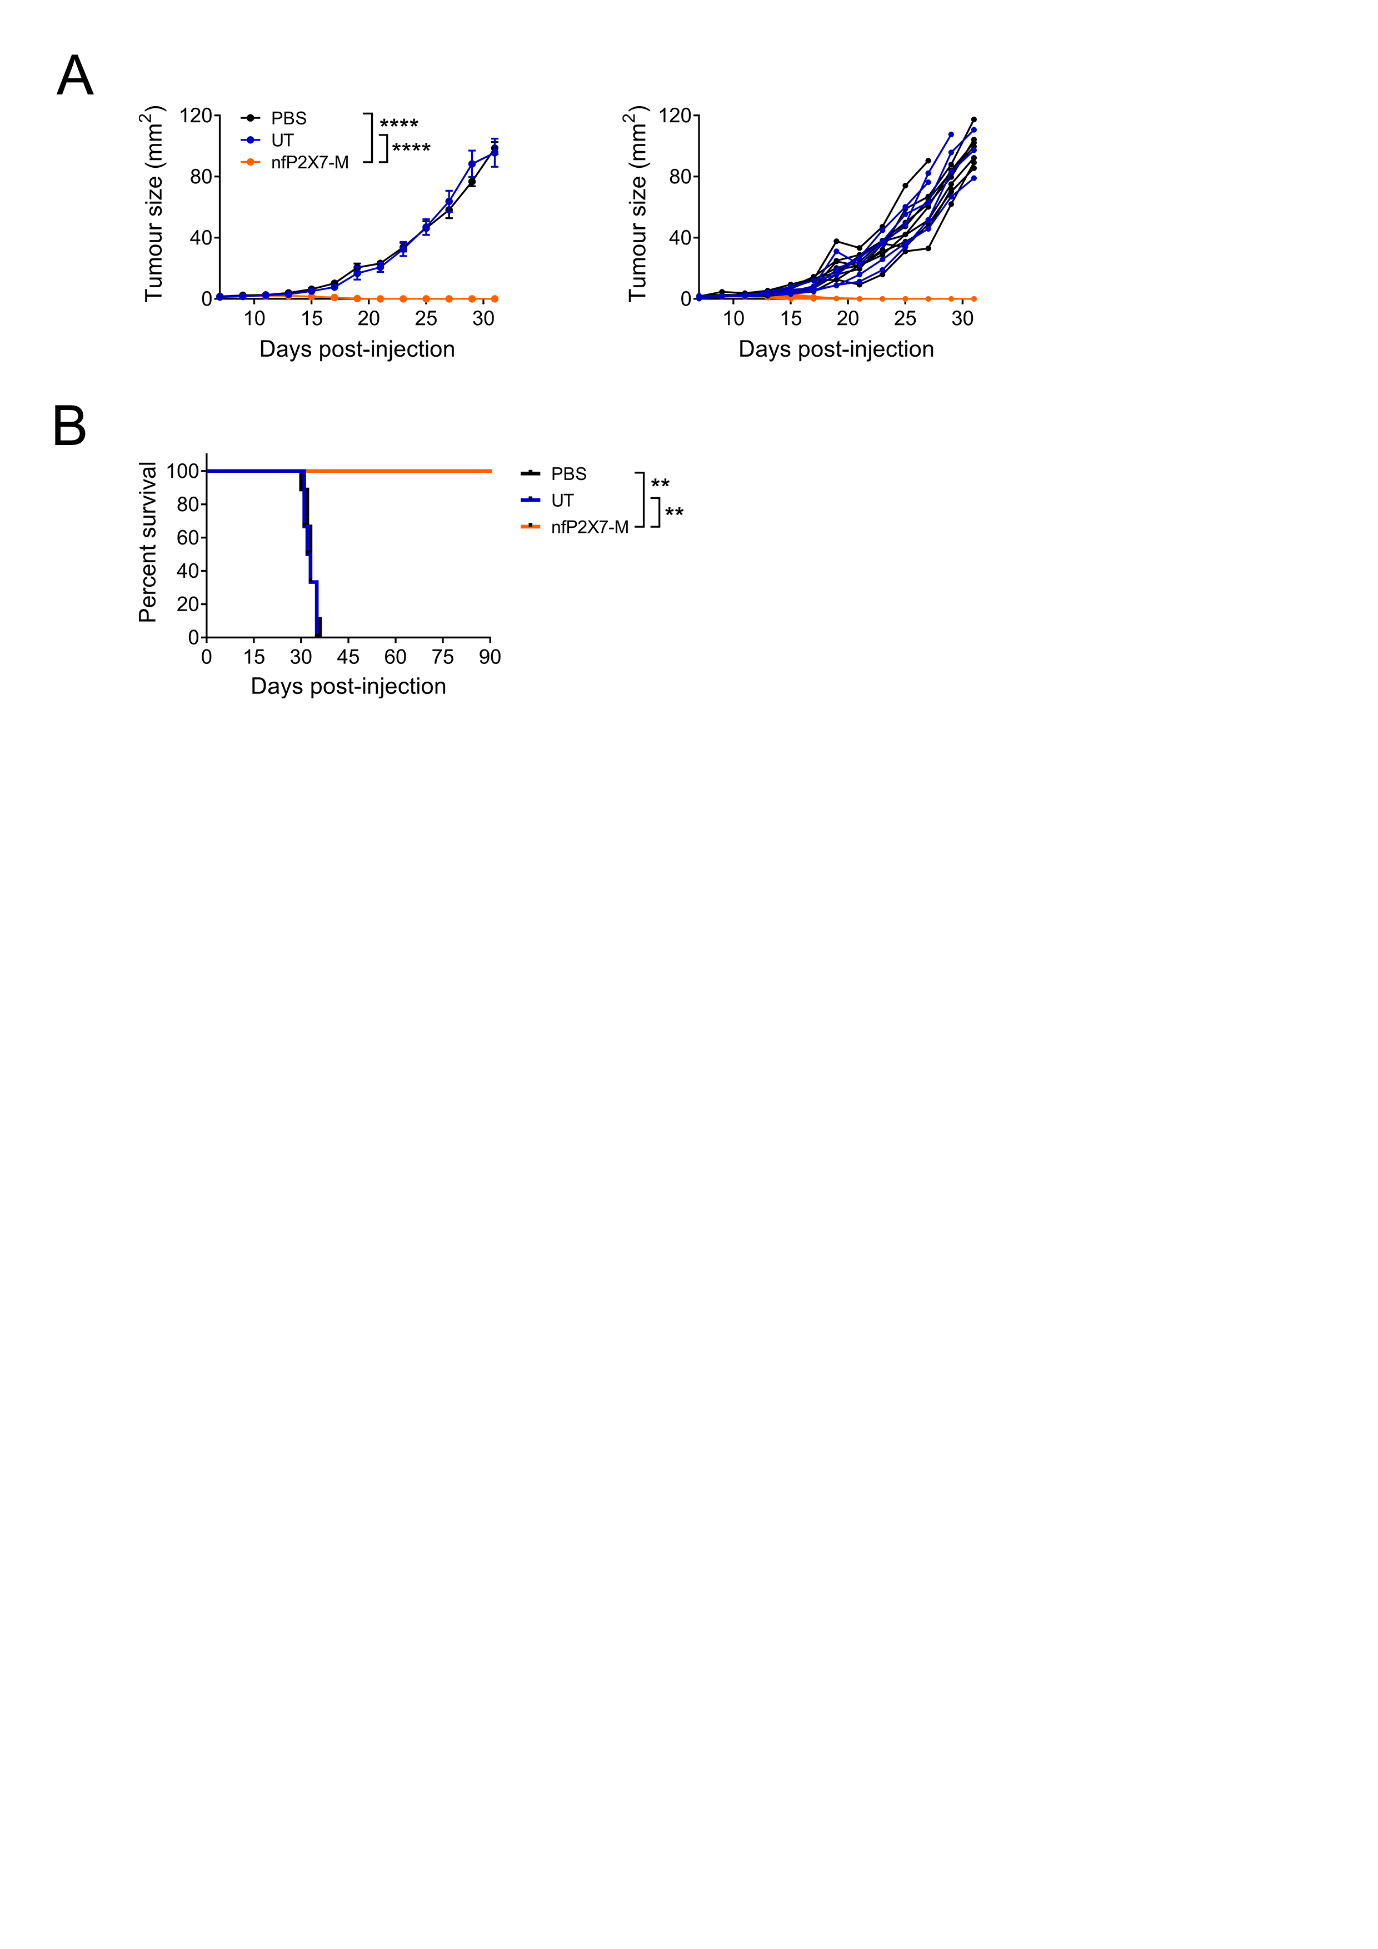


**Supplementary Figure 10:** NSG mice were subcutaneously injected with 1x106 PC3 human prostate cancer cells into the lower abdomen and intravenously injected with 2x107 nfP2X7-targeting CAR-T cells or untransduced T cells on d3 post-tumour injection. **(A)** Tumour growth curves as pooled and individual mice; two-way ANOVA with Bonferroni’s post-test. **(B)** Kaplan-Meier survival curve; Mantel-Cox test. Data from a single experiment and represented as mean ± SEM; ** p≤0.01, **** p≤0.0001; n = 5-9.

**Supplementary Video 1.** Real-time imaging of nfP2X7-M CAR-T cell adhesion and transmigration through blood vessels *in vivo*. For intravital microscopy, 2x106 MDA-MB-231-LM2 cells expressing GFP was injected into the mammary fat pad of NSG mice and allowed to establish for 2 weeks. The mice then received an intravenous injection of 2x107 nfP2X7-M CAR-T cells fluorescently labelled with CellTracker Orange as well as Cy5 Dextran (for visualisation of blood vessels with active blood flow). The surgically exposed tumour was then placed under a 20x objective lens and the interaction between the CAR T cells and the blood vessels were visualised in real time. Representative video showing nfP2X7-M CAR-T cells firmly adhered to a blood vessel and transmigrating across a blood vessel. Representative of two independent experiments. Scale bars = 50 µm.

**Supplementary Video 2.** Real-time imaging of nfP2X7-M CAR-T cells killing MDA-MB-231 breast cancer cells *in vitro*. MDA-MB-231 breast cancer cells were seeded into wells and allowed to grow overnight. nfP2X7-M CAR-T cells or untransduced (UT) T cells pulsed with Fluo-4 AM (green), and PI (red) were added into the wells at the same time. Images were taken at 10s intervals for at least 3 hours using a 40x objective lens on the Zeiss LSM700. Representative of three independent experiments.
