# Supplementary material for: Pre-clinical validation of a novel pan-cancer CAR-T cell immunotherapy against nfP2X7
Source: Research Square preprint supplement (doi:10.21203/rs.3.rs-1073214/v1), 2021-12-01
Supplement: Supplementary file 2 [file 785e6925243672e54d02aa16.docx]

Reporting Experimental Design

Sample size: The number of mice required for the *in vivo* models was based on a standard deviation that has been determined by empirical experiment (e.g. tumour sizes from previous experiments) and a biologically meaningful difference in the mean of that variable that we would need between groups (e.g 20% difference between control and test groups, stand deviation of 20mm2). This assumes a Power level >0.8 (>80% chance of rejecting null hypothesis if there are differences between groups) and alpha <0.05 (>95% confidence).

In vitro assays were performed in triplicate for each point and repeated 2 or 3 times.

Randomization: NA

Blinding: Technicians performing the *in vivo* experiments were blinded to the T cell groups for the duration of the experiment and during data analysis.

Replication: For the in vivo MDA-MB-231 xenograft model data presented from two independent experiments following *in vivo* delivery of 2 independent CAR-T cell preparations derived from 1 healthy donor. For the in vivo PC3 xenograft model data presented from six independent experiments. In vitro cytotoxicity assays were done in triplicate at each point and all experiments were performed with three biological replicates representing three independent donors.

Reporting Statistics

Paired *t* test was performed comparing the nfP2X7-M CAR-T with CD3+ UT at the indicated time points.

For all in vivo two-way ANOVA with Bonferroni’s post-test.

Describing Reagents

Antibodies:

| **Primary antibodies for flow cytometry and cell culture** | | | | |  |
| --- | --- | --- | --- | --- | --- |
| Antigen | Conjugate | Clone | Manufacturer | Final concentration or dilution from manufacturer’s test size | Final dilution |
| CD3 | BUV737  Purified (cell culture) | UCHT1  OKT3 | BD  Invitrogen | 30ng/ml  1/8 | 1:250 |
| CD4 | BUV496 | SK3 | BD | 1/4 | 1:200 |
| CD8 | BUV395 | RPA-T8 | BD | 1/8 | 1:250 |
| Granzyme B | BV421 | GB11 | BD | 1/2 | 1:100 |
| Perforin | FITC | B-D48 | Biolegend | 1/4 | 1:200 |
| CD107a | PECy7 | H4A3 | BD | 1/6 | 1:300 |
| IFNγ | PE | B27 | BD | Recommended | 1:12.5 |
| TNFa | APC | MAb11 | BD | 1/2 | 1:200 |
| IL-2 | BV711 | 5344.111 | BD | 1/4 | 1:50 |
| CCR7 | PE | 150503  2-L1-A | BD  BD | Recommended  Recommended | 1:12.5 |
| CD45RA | BB515 | HI100 | BD | 1/6 | 1:250 |
| CD45RO | PECy7 | UCHL1 | BD | Recommended | 1:50 |
| CD62L | BV421 | DREG-56 | BD | 1/2 | 1:15 |
| EGFR | eF660 | me1B3 | BD | Recommended | 1:50 |
| CD27 | APC | M-T271 | BD | Recommended | 1:25 |
| CD28 | BUV737 | CD28.2 | BD | Recommended | 1:50 |
| CD95 | PECy7 | DX2 | BD | 1/8 | 1:200 |
| CXCR3 | BV421 | 1C6/CXCR3 | BD | Recommended | 1:50 |
| PD-1 | PECy7 | EH12.1 | BD | Recommended | 1:50 |
| CTLA-4 | BV421 | BNI3 | BD | Recommended | 1:50 |
| TIM-3 | BB515 | 7D3 | BD | Recommended | 1:50 |
| LAG-3 | APC | T47-530 | BD | Recommended | 1:50 |
| CD39 | PE-CF594  BUV805 | TU66 | BD | Recommended | 1:50 |
| **Related flow cytometry reagents** | | | | |  |
| Reagent | Conjugate | Clone | Manufacturer | Final dilution |  |
| Fixable Viability Dye | 780 | - | BD | 1/1000 | 1:1000 |

Cell lines:

| Cell line name | Cancer type | Media | Obtained from |
| --- | --- | --- | --- |
| PC9 | Adenocarcinoma | RPMI 1640 media (Sigma Aldrich) supplemented with 2mM L-glutamine (Gibco) and 10% foetal bovine serum (Scientifix) | CellBank Australia, the European Collection of Cell Cultures |
| K562, | Leukemia | RPMI 1640 media (Sigma Aldrich) supplemented with 10% foetal bovine serum (Scientifix) | American Type Culture Collection |
| K562-OKT3 | Leukemia | RPMI 1640 media (Sigma Aldrich) supplemented with 10% foetal bovine serum (Scientifix) | Kindly provided by Prof Michale Jensen (Seattle Children’s Research Institute, Seattle). |
| K562-Luc | Leukemia | RPMI 1640 media (Sigma Aldrich) supplemented with 10% foetal bovine serum (Scientifix) | CellBank Australia, Japanese Collection of Research Bioresources Cell Bank |
| MDA-MB-231 | Breast | DMEM media (Sigma Aldrich) supplemented with 10% foetal bovine serum (Scientifix) | The human triple negative breast adenocarcinoma MDA-MB-231 cell line used in *in vivo* experiments was kindly provided by Prof Robin Anderson (Olivia Newton-John Cancer Research Institute, VIC). |
| MDA-MB-231-Luc | Breast | DMEM media (Sigma Aldrich) supplemented with 10% foetal bovine serum (Scientifix) | CellBank Australia, Japanese Collection of Research Bioresources Cell Bank |
| MDA-MB-231-LM2 | Breast | DMEM media (Sigma Aldrich) supplemented with 10% foetal bovine serum (Scientifix) | Gifted from J Massague, Sloan Kettering Institute |
| BT-549-Luc | Breast | RPMI 1640 media (Sigma Aldrich) supplemented with 10% foetal bovine serum (Scientifix) and 0.023IU Insulin (Protaphone) | CellBank Australia, Japanese Collection of Research Bioresources Cell Bank |
| HCT-116 | Colorectal | DMEM media (Sigma Aldrich) supplemented with 2 mM L-glutamine (Gibco) and 10% foetal bovine serum (Scientifix) | CellBank Australia, the European Collection of Cell Cultures |
| Lim-1215 | Colorectal | RPMI 1640 media (Sigma Aldrich) supplemented with 2mM L-glutamine (Gibco), 10% foetal bovine serum (Scientifix), 25mM Hepes, 0.6mg/mL Insulin (Protaphone), 1mg/mL Hydrocortisone (Sigma) and 10mM 1-Thioglycerol (Merck) | CellBank Australia |
| LOVO | Colorectal | Ham’s F12 media (Sigma Aldrich) supplemented with 10% foetal bovine serum (Scientifix) | European Collection of Cell Cultures, purchased from CellBank Australia |
| U87 | Glioma | EMEM (EBSS) + 2mM Glutamine + 1% Non-Essential Amino Acids (NEAA) + 1mM Sodium Pyruvate (NaP) + 10% Foetal Bovine Serum (FBS). | American Type Culture Collection |
| UM-SCC-1 | Head and neck squamous carcinoma | RPMI 1640 media (Sigma Aldrich) supplemented with 10% foetal bovine serum (Scientifix) | American Type Culture Collection |
| NCI-H460-Luc | Lung | RPMI 1640 media (Sigma Aldrich) supplemented with 10% foetal bovine serum (Scientifix) | CellBank Australia, Japanese Collection of Research Bioresources Cell Bank |
| Namalwa | Lymphoma | RPMI 1640 media (Sigma Aldrich) supplemented with 2mM L-glutamine (Gibco) and 10% foetal bovine serum (Scientifix) | CellBank Australia, the European Collection of Cell Cultures |
| Raji | Lymphoma | RPMI 1640 media (Sigma Aldrich) supplemented with 2mM L-glutamine (Gibco) and 10% foetal bovine serum (Scientifix) | CellBank Australia, the European Collection of Cell Cultures |
| Ramos | Lymphoma | RPMI 1640 media (Sigma Aldrich) supplemented with 2mM L-glutamine (Gibco) and 10% foetal bovine serum (Scientifix) | CellBank Australia, the European Collection of Cell Cultures |
| C32 | Melanoma | RPMI 1640 media (Sigma Aldrich) supplemented with 10% foetal bovine serum (Scientifix) | American Type Culture Collection |
| M21 | Melanoma |  | American Type Culture Collection |
| Skmel-5 | Melanoma | RPMI 1640 media (Sigma Aldrich) supplemented with 10% foetal bovine serum (Scientifix) | American Type Culture Collection |
| Skmel-28 | Melanoma | RPMI 1640 media (Sigma Aldrich) supplemented with 10% foetal bovine serum (Scientifix) | American Type Culture Collection |
| Be(2)-M17 | Neuroblastoma | Ham’s F12 / EMEM media (both Sigma Aldrich) supplemented with 1% NEAA (Life Technologies), 2 mM L-glutamine (Gibco) and 15% foetal bovine serum (Scientifix) | CellBank Australia, the European Collection of Cell Cultures |
| Kelly | Neuroblastoma | RPMI 1640 media (Sigma Aldrich) supplemented with 2mM L-glutamine (Gibco) and 10% foetal bovine serum (Scientifix) | CellBank Australia, the European Collection of Cell Cultures |
| SH-5Y-SY | Neuroblastoma | Ham’s F12 / EMEM (ATCC) media supplemented with 1% NEAA (Life Technologies), 2 mM L-glutamine (Gibco) and 15% foetal bovine serum (Scientifix) | CellBank Australia, the European Collection of Cell Cultures |
| SK-N-DZ | Neuroblastoma | DMEM media (Sigma Aldrich) supplemented with 2 mM L-glutamine (Gibco), 20% foetal bovine serum (Scientifix) and 1% NEAA (Sigma Aldrich) | CellBank Australia, the European Collection of Cell Cultures |
| OVCAR3-Luc | Ovarian | RPMI 1640 media (Sigma Aldrich) supplemented with 15U Insulin (Protaphone), 20% foetal bovine serum (Scientifix) | CellBank Australia, Japanese Collection of Research Bioresources Cell Bank |
| OVCAR5 | Ovarian | RPMI 1640 media (Sigma Aldrich) supplemented with 2 mM L-glutamine (Gibco) and 10% foetal bovine serum (Scientifix) | Dr Thomas Hamilton (Fox Chase Cancer Center, PA, USA) |
| AsPC-1/CMV-Luc | Pancreatic | RPMI 1640 media (Sigma Aldrich) supplemented with 10% foetal bovine serum (Scientifix) | CellBank Australia, Japanese Collection of Research Bioresources Cell Bank |
| PC3-Luc | Prostate | Ham’s F12 media supplemented with 7% foetal bovine serum (Scientifix) | CellBank Australia, the European Collection of Cell Cultures |
| DU-145-luc | Prostate | EMEM media (Sigma Aldrich) supplemented with 10% foetal bovine serum (Scientifix) | CellBank Australia, Japanese Collection of Research Bioresources Cell Bank |
| RPMI-8226 | Myeloma | RPMI 1640 media (Sigma Aldrich) supplemented with 10% foetal bovine serum (Scientifix) | Kindly provided by Dr Krzysztof Mrozik, University of Adeliade |
| RD | Rhabdomyosarcoma | DMEM media (Sigma Aldrich) supplemented with 2 mM L-glutamine (Gibco), 10% foetal bovine serum (Scientifix), 2% NEAA (Life Technologies) and 2% Vitamins (Gibco) | CellBank Australia, the European Collection of Cell Cultures |
